# Supplementary material for: Sandwich (Amnion/Conjunctival-Limbal Autograft/Amnion) Transplantation for Recurrent Pterygium with Restrictive Strabismus
Source: MDPI journal article supplement (doi:10.3390/jcm11237193), 2022-12-03
Supplement: s1 [file jcm-2032703-supplementary.pdf › jcm-2032703-supplementary.pdf]

**Table S1. Preoperative and Postoperative Measurements for Patients Undergoing Sandwich Transplantation following Recurrent Pterygium Excision.**

| Eye Number | Age (Years) | Gender | Number of Prior Surgeries | Best-Corrected Visual Acuity |         | Symblepharon | Primary position      |             | Fornix Reconstruction | Follow-up (months) | Other Diagnosis |
|------------|-------------|--------|---------------------------|------------------------------|---------|--------------|-----------------------|-------------|-----------------------|--------------------|-----------------|
|            |             |        |                           | Pre-op                       | Post-op |              | Pre-op Esotropia (PD) | Post-op     |                       |                    |                 |
| 1.         | 46          | M      | 3 OS                      | 1.0                          | 1.0     | +            | 25                    | Orthotropia | +                     | 12                 | No              |
| 2.         | 36          | F      | 4 OD                      | 1.0                          | 1.0     | +            | 20                    | Orthotropia | +                     | 36                 | No              |
| 3.         | 80          | M      | 1 OS                      | 0.1                          | 0.3     | +            | 20                    | Orthotropia | +                     | 32                 | Cataract        |
| 4.         | 60          | F      | 3 OS                      | CF/15cm                      | 0.6     | +            | 30                    | Orthotropia | +                     | 31                 | Cataract        |
| 5.         | 60          | M      | 1 OD                      | 0.3                          | 0.5     | -            | 15                    | Orthotropia | -                     | 12                 | Cataract        |
| 6.         | 68          | M      | 1 OS                      | 0.6                          | 0.6     | -            | 10                    | Orthotropia | -                     | 18                 | Cataract        |
| 7.         | 55          | M      | 1 OS                      | 1.0                          | 1.0     | +            | 15                    | Orthotropia | +                     | 20                 | No              |
| 8.         | 54          | F      | 2 OS                      | 0.1                          | 0.3     | -            | 17                    | Orthotropia | -                     | 14                 | Cataract        |
| 9.         | 66          | M      | 1 OS                      | 0.4                          | 0.4     | -            | 12                    | Orthotropia | -                     | 15                 | Cataract        |
| 10.        | 73          | F      | 1 OS                      | 0.8                          | 0.8     | -            | 16                    | Orthotropia | -                     | 16                 | IOL insertion   |
| 11.        | 68          | F      | 2 OS                      | 0.1                          | 0.4     | -            | 10                    | Orthotropia | -                     | 13                 | Cataract        |

\* Abbreviations: F= Female; M= Male; OD= Right eye; OS= Left eye; - = No; + = Yes.
